# Supplementary material for: Mechanistic Insights on the In Vitro Antibacterial Activity and In Vivo Hepatoprotective Effects of Salvinia auriculata Aubl against Methotrexate-Induced Liver Injury
Source: MDPI journal article supplement (doi:10.3390/ph15050549), 2022-04-29
Supplement: s1 [file s1]

Negative -MODE – TIC (3 Triplicate injection)

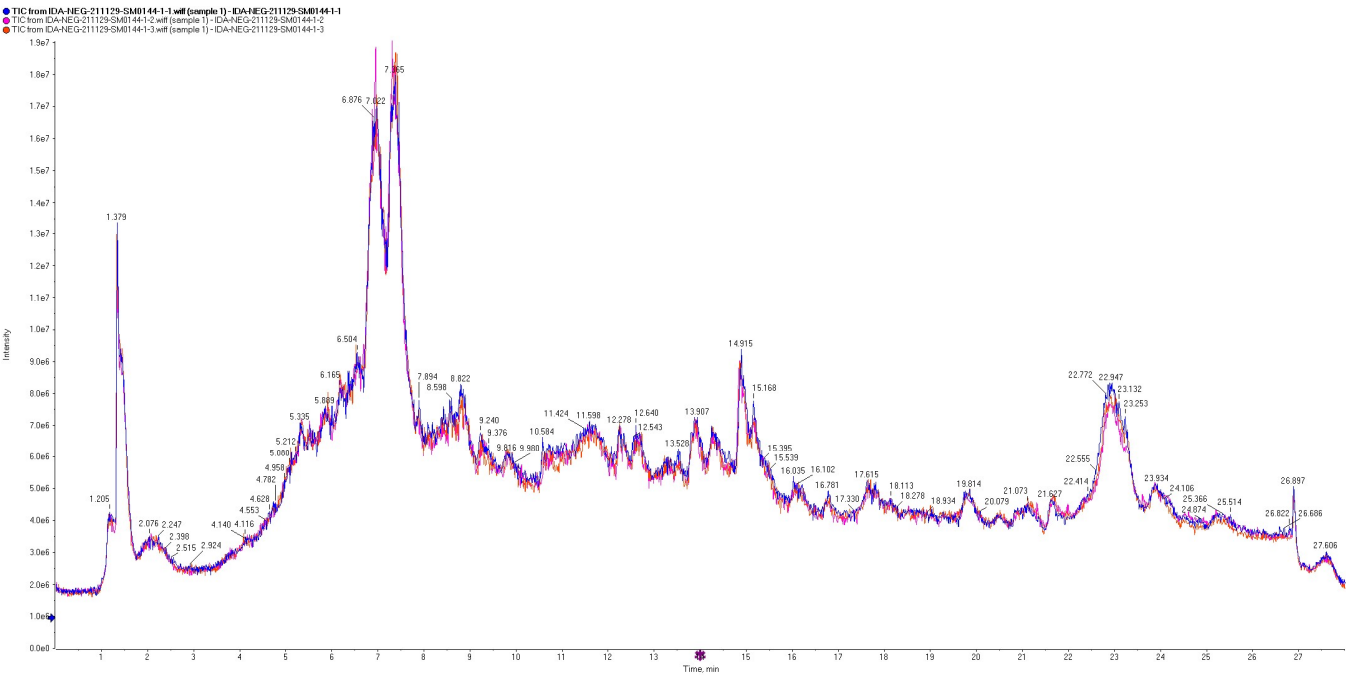

Only one sample TIC

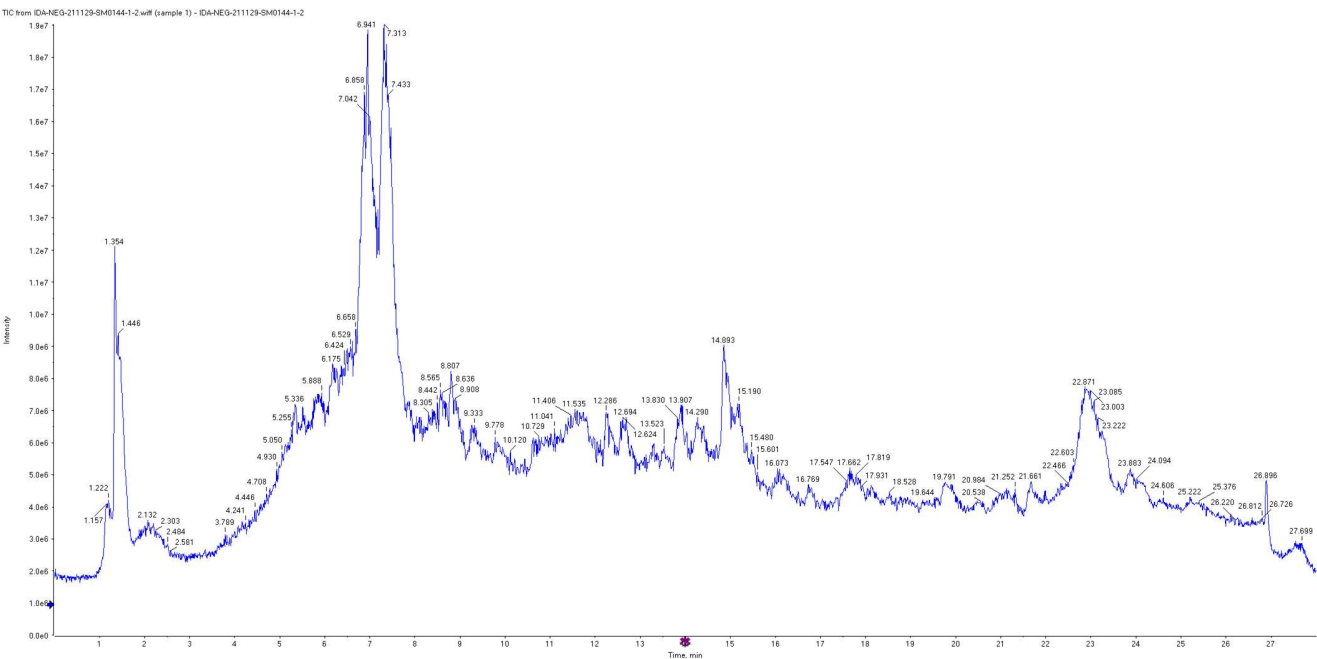

After Gaussian smooth (Smoothing width 2.0)

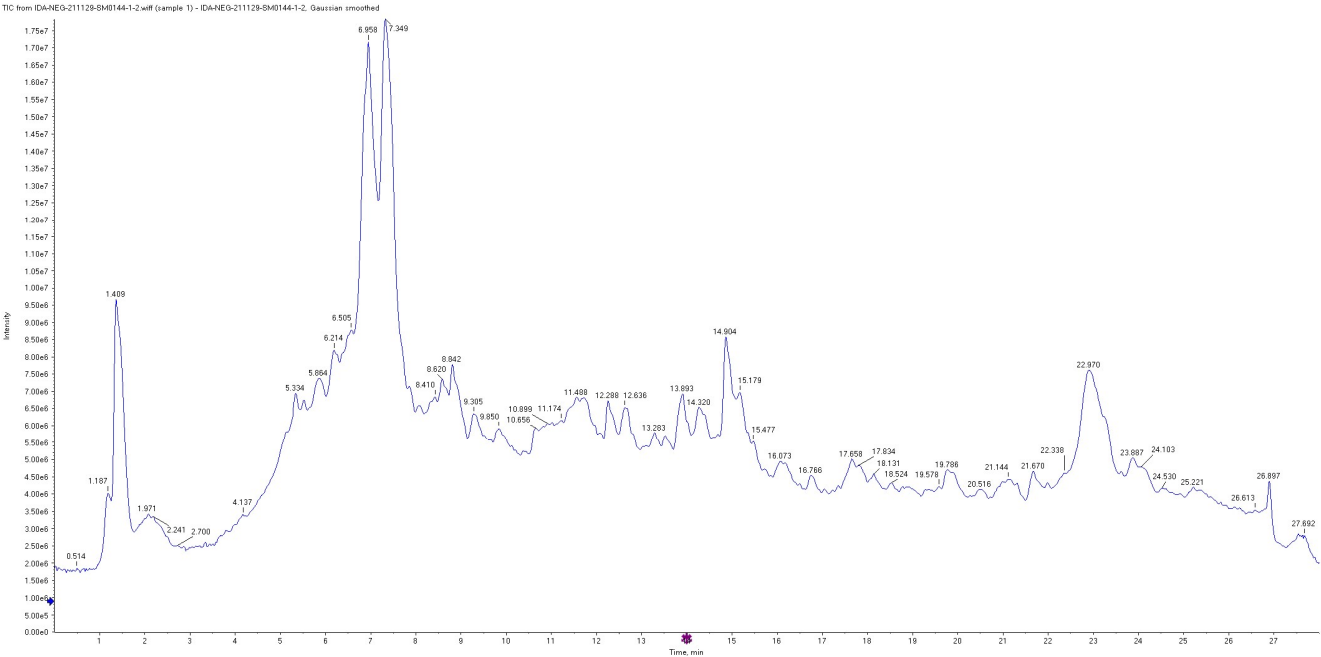

SM000: Negative -MODE – BPC

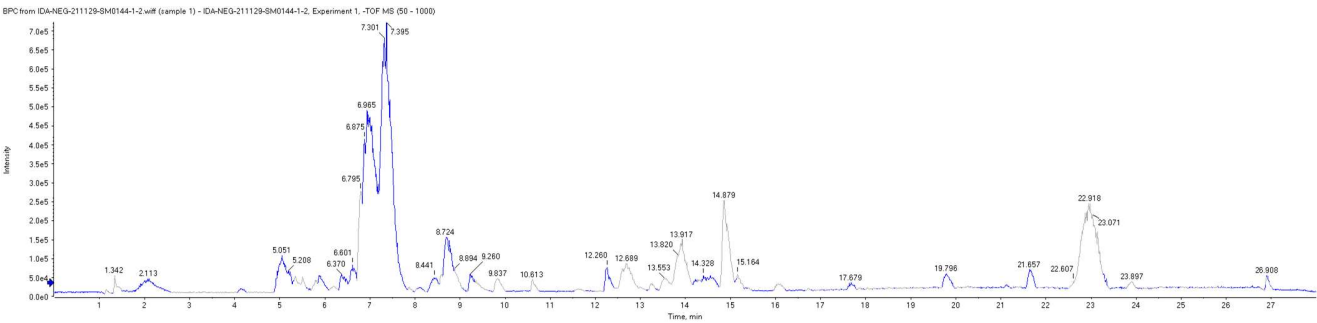

BPC -(Smoothing width 2.0)

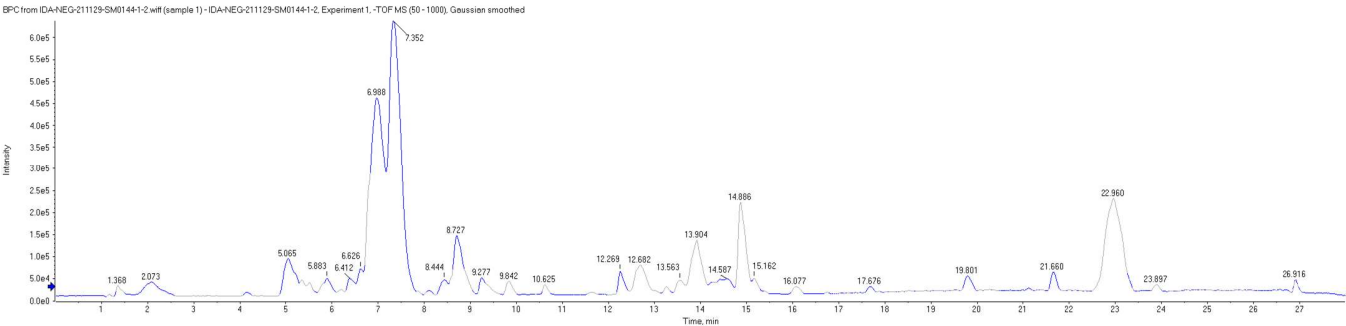

## SM00144-1: Positive -MODE – TIC Duplicate injection

● TIC from IDA-POS-211123-SM0144-1-2 with (sample 1) - IDA-POS-211123-SM0144-1-2  
 ● TIC from IDA-POS-211123-SM0144-1-3 with (sample 1) - IDA-POS-211123-SM0144-1-3

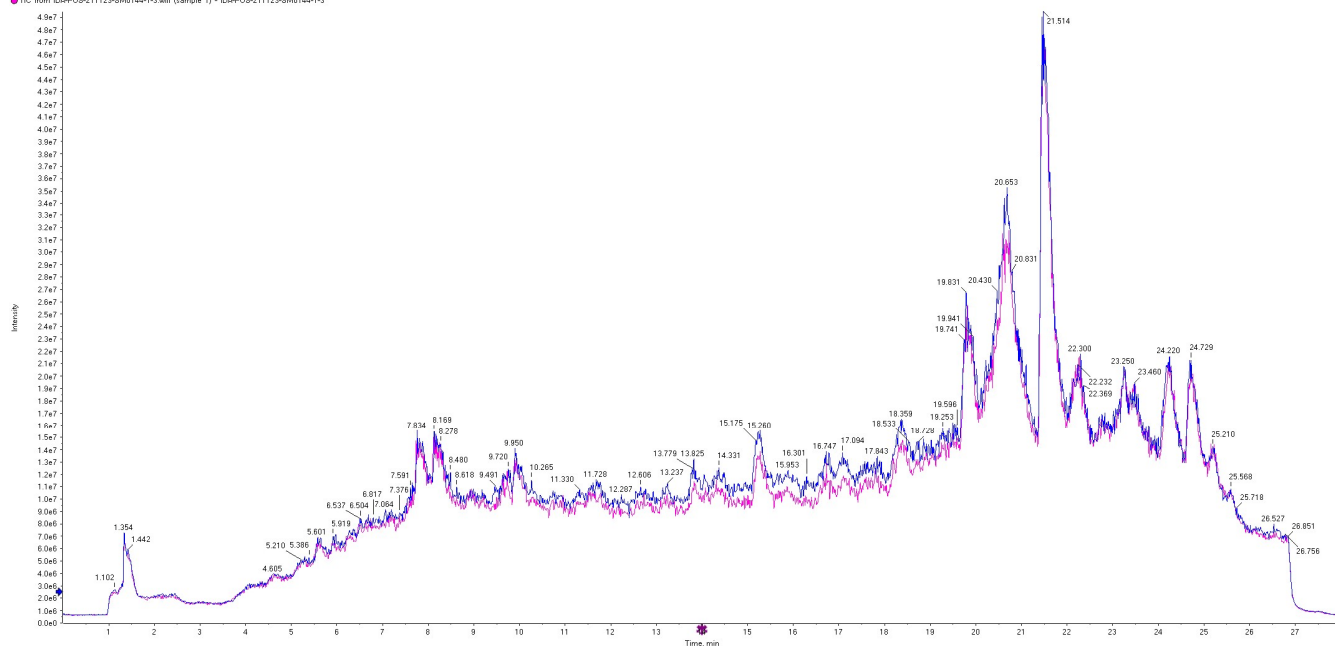

TIC from IDA-POS-211123-SM0144-1-2 with (sample 1) - IDA-POS-211123-SM0144-1-2

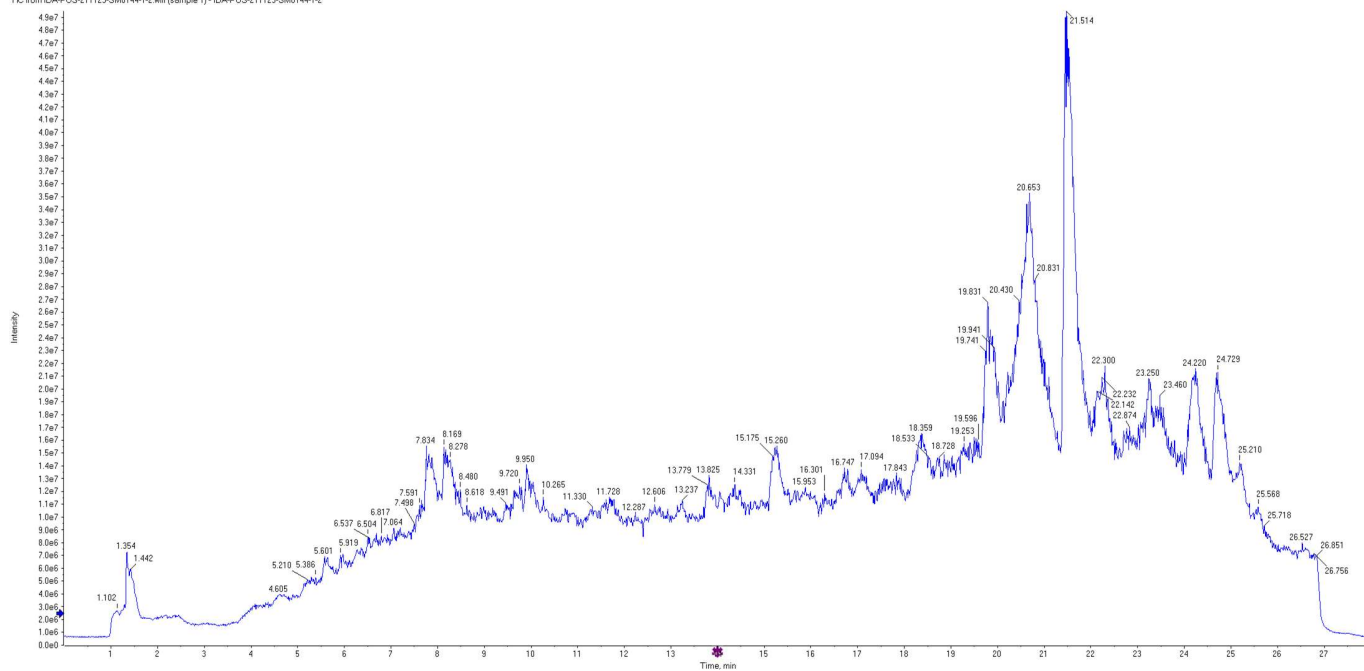

## After Gaussian smooth (Smoothing width 2.0)

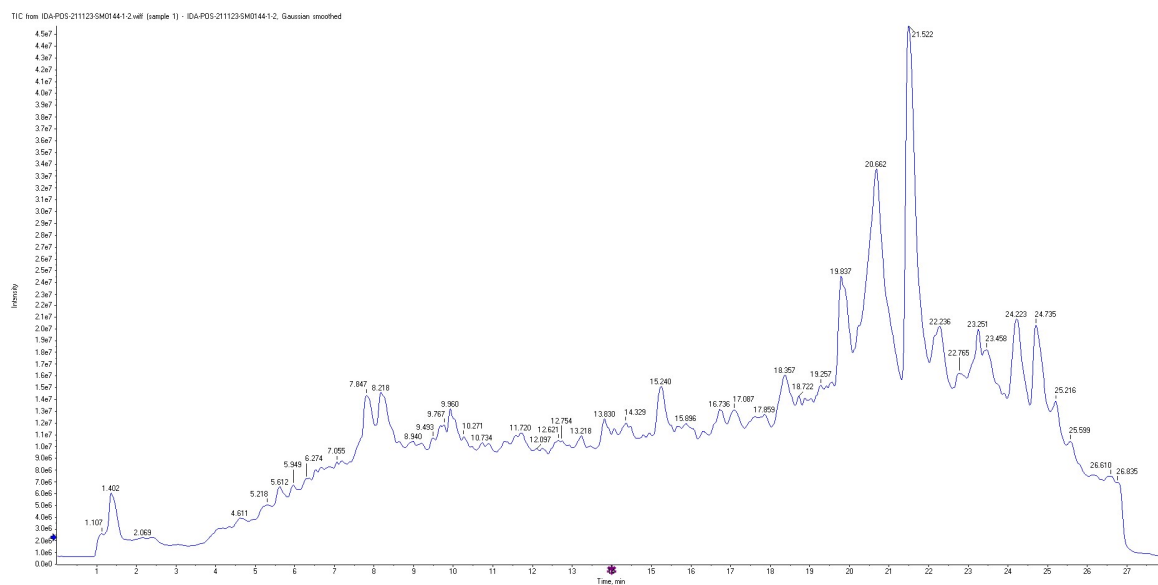

## SM000: positive -MODE – BPC

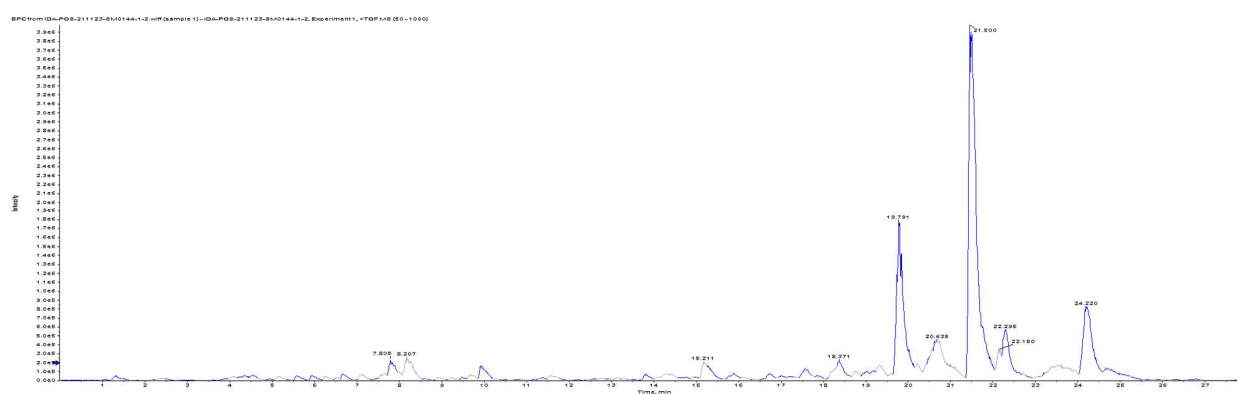

## After smooth

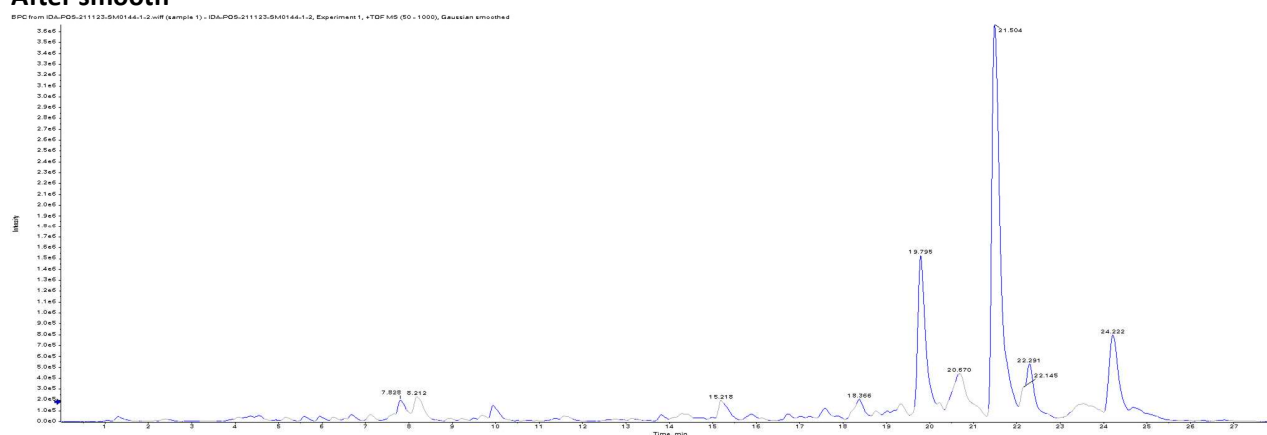

**Figure S1.** The total ion chromatograms (TIC) of *Salvinia auriculata* extract

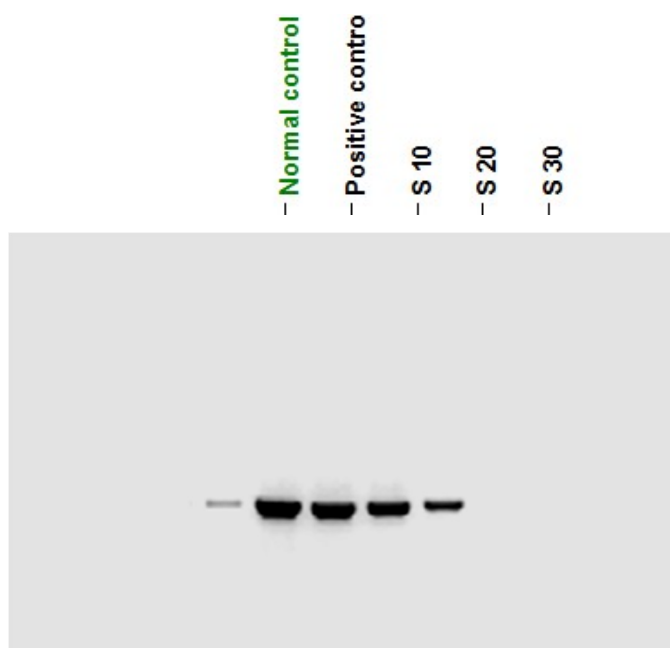

Photograph of NLPR3 antibody protein expression level for samples.

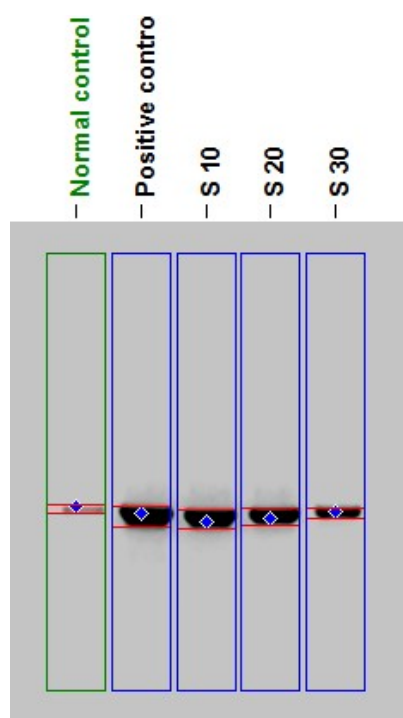

Figure of Computerized analysis of NLPR3 antibody protein expression level for samples.

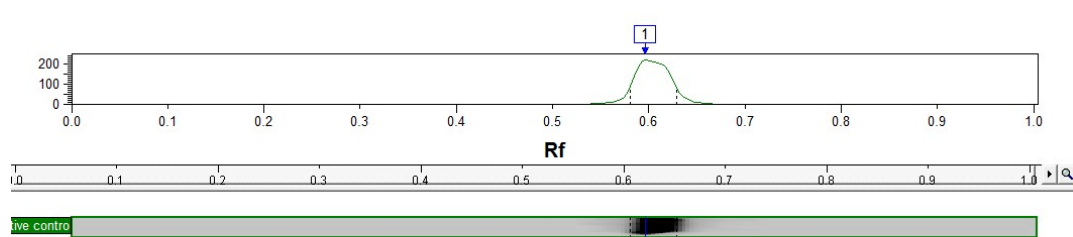

Figure of dendrogram of positive control sample.

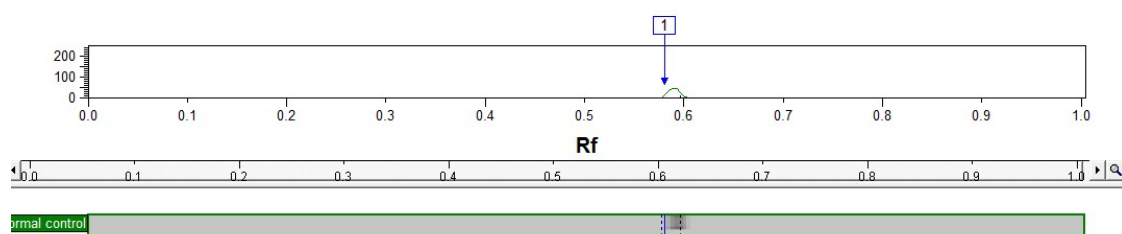

Figure of dendrogram of normal control sample.

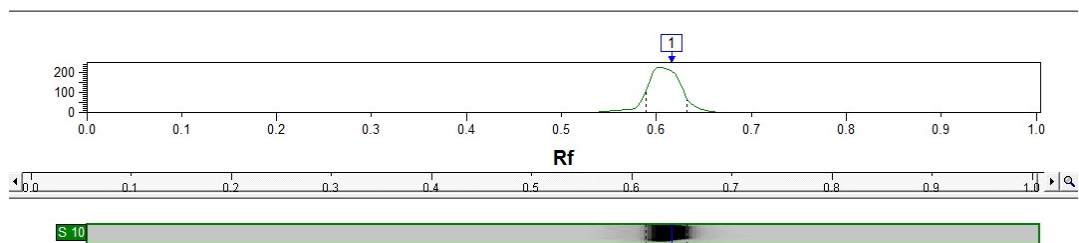

dendogram of treated sample with S 10.

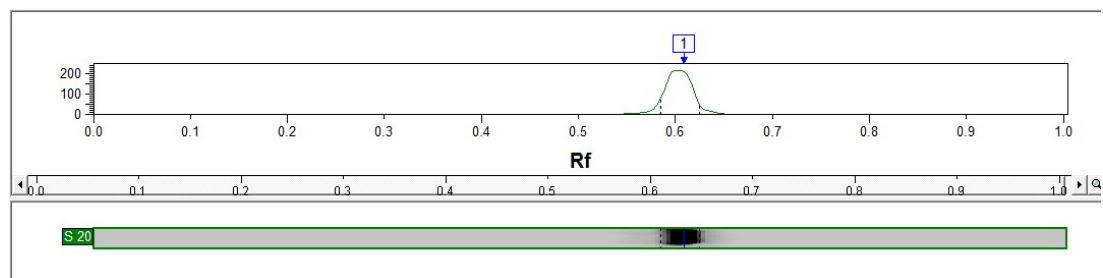

dendogram of treated sample with S 20.

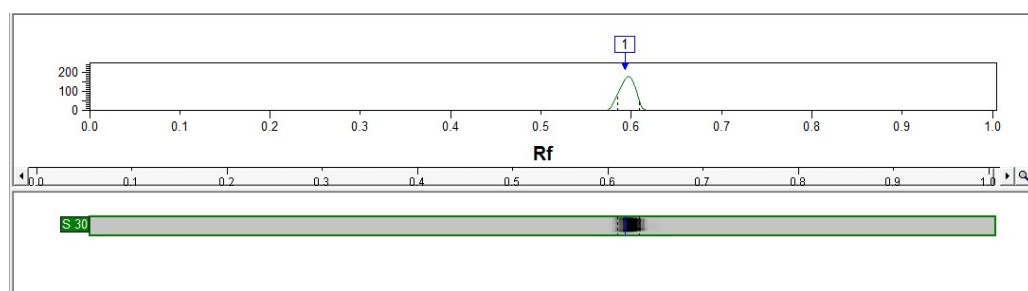

dendogram of treated sample with S 30.

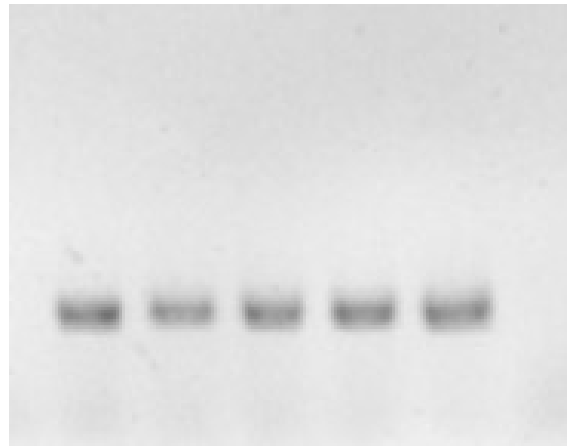

Photograph of  $\beta$ -actin protein expression level for samples.

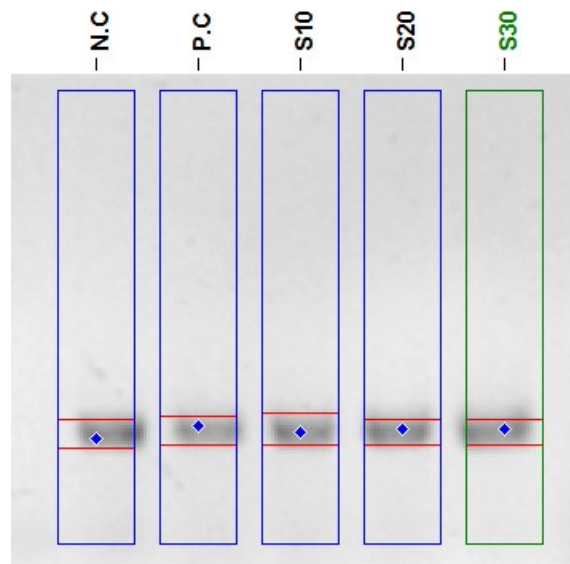

Figure of Computerized analysis of  $\beta$ -actin protein expression level for samples

**Figure S2.** NLPR3 western raw data



**Table S1.** MIC values of SAME against the tested isolates

| <b>Isolate code</b> | <b>MIC value (µg/mL)</b> | <b>Isolate code</b> | <b>MIC value (µg/mL)</b> |
|---------------------|--------------------------|---------------------|--------------------------|
| <b>A1</b>           | 16                       | A15                 | 16                       |
| <b>A2</b>           | 16                       | A16                 | 16                       |
| <b>A3</b>           | 128                      | A17                 | 32                       |
| <b>A4</b>           | 32                       | A18                 | 128                      |
| <b>A5</b>           | 16                       | A19                 | 128                      |
| <b>A6</b>           | 32                       | A20                 | 64                       |
| <b>A7</b>           | 64                       | A21                 | 32                       |
| <b>A8</b>           | 64                       | A22                 | 16                       |
| <b>A9</b>           | 128                      | A23                 | 32                       |
| <b>A10</b>          | 16                       | A24                 | 32                       |
| <b>A11</b>          | 32                       | A25                 | 128                      |
| <b>A12</b>          | 32                       | A26                 | 64                       |
| <b>A13</b>          | 128                      | A27                 | 32                       |
| <b>A14</b>          | 32                       |                     |                          |

**Table S2.** Primers used and their sequence.

| Target Gene                   | Probe                                                                      | Accession Number | References                |
|-------------------------------|----------------------------------------------------------------------------|------------------|---------------------------|
| <b>Caspase-1</b>              | F-5'-GAA AAG GCA CGA GAC CTG TGC-3'<br>R-5'-CTT GAG GGA ACC ACT CGG TCC-3' | NM_004346        | Hazman et al.,<br>2018    |
| <b>IL-1<math>\beta</math></b> | ACT CCT TAG TCC TCG GCC A<br>TGG TTT CTT GTG ACC CTG AGC                   | NM_000576.2      | Meier et al., 2019        |
| <b>Nrf2</b>                   | CCATGCCTTCTTCCACGAA<br>AGGGCCCATGGATTTCAGTT                                | NM_031789        | Espinosa et al.,<br>2014  |
| <b>IL-18</b>                  | TAA GGA TAC GGA CTA CGG CT<br>GTT GGT GGA GGT CTG AGT TTA                  | EF159728         | Dong and Yuan<br>2018     |
| <b>Caspase-3</b>              | 5'-TGAAGGCAAGGT GCTAAA-3'<br>5'-CTGGCTCAAACCACATTCTC-3'                    | NM_001284409.1   | LUAN et al., 2007         |
| <b>GADPH</b>                  | 5'-AGAAGG CTGGGGCTCATTTG-3'<br>5'-AGGGGCCAT CCACAGTCTTC-3'                 | NM_008084        | Jing-Jing et al.,<br>2012 |
